# Supplementary material
Source: PubMed Central journal article supplement (PMC6800345)
Supplement: pnas.1901893116.sapp.pdf [file pnas.1901893116.sapp.pdf]

## Supplementary figures

A

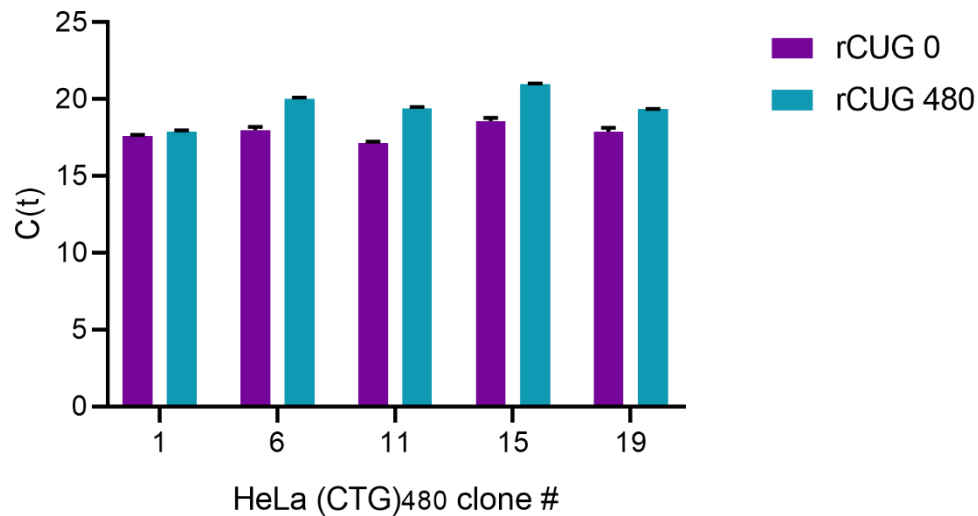

B

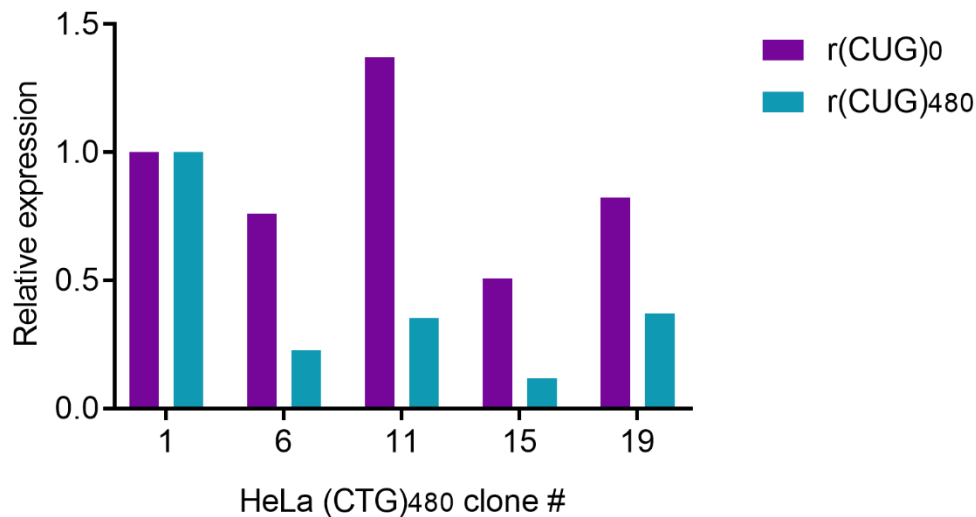

**Fig. S1.**

Expression of r(CUG)0 and r(CUG)480 in stable HeLa (CTG)480 clones. Multiplex RT-qPCR performed on RNA extracted from cultured HeLa (CTG)480 clonal lines simultaneously probing for r(CUG)0 and r(CUG)480 plotted by (A) C(t) values (mean of 3 technical replicates  $\pm$  s.d.) or (B) Mean relative expression normalized to clone 1.

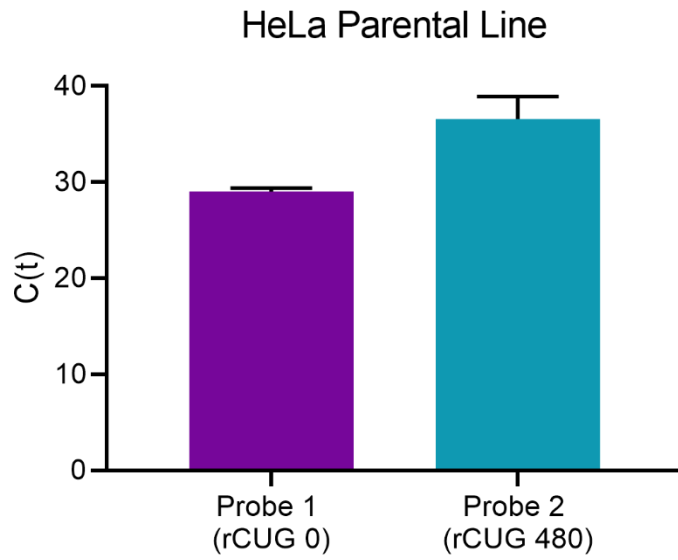

**Fig. S2.**

Multiplex RT-qPCR performed on RNA extracted from the HeLa parental cell line from which the stable HeLa (CTG)<sub>480</sub> clones were derived, simultaneously probing for r(CUG)<sub>0</sub> and r(CUG)<sub>480</sub> plotted by C(t) values (mean of 3 technical replicates ± s.d.).

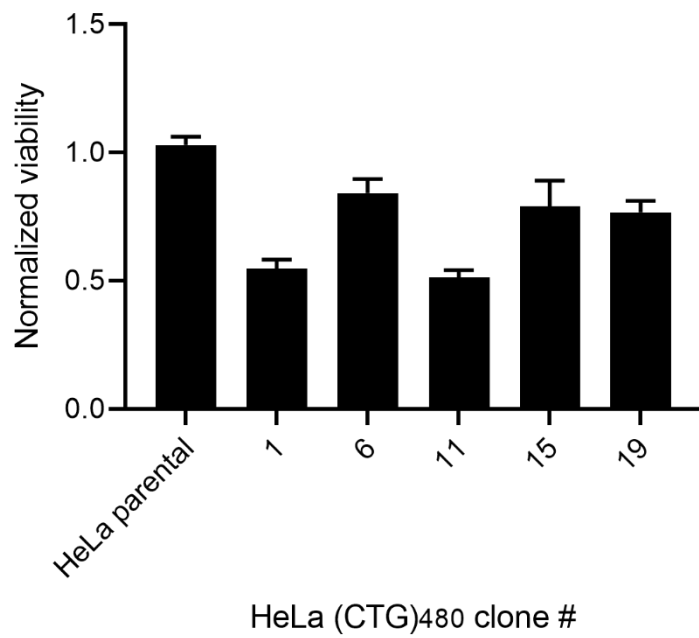

**Fig. S3**

Cell viability normalized to the HeLa parental line (mean + s.d. n=3 biological replicates).

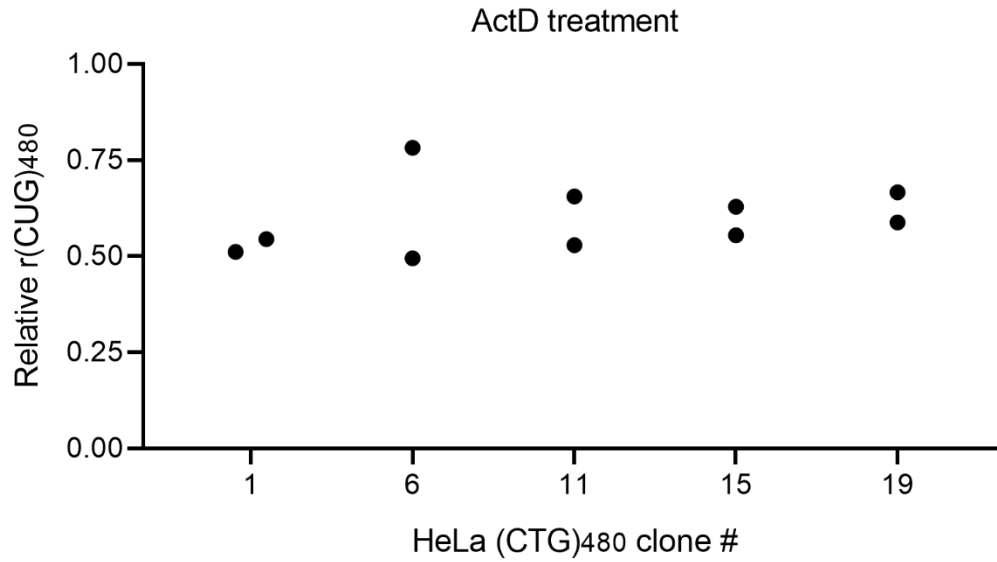

**Fig. S4**

HeLa (CTG)480 clones were treated with ActD at 20 nM for ~ 24 hours and relative r(CUG)480 levels normalized to r(CUG)<sub>0</sub> were determined using multiplex RT-qPCR (n=2 biological replicates).

DAPI (CAG)8 Probe

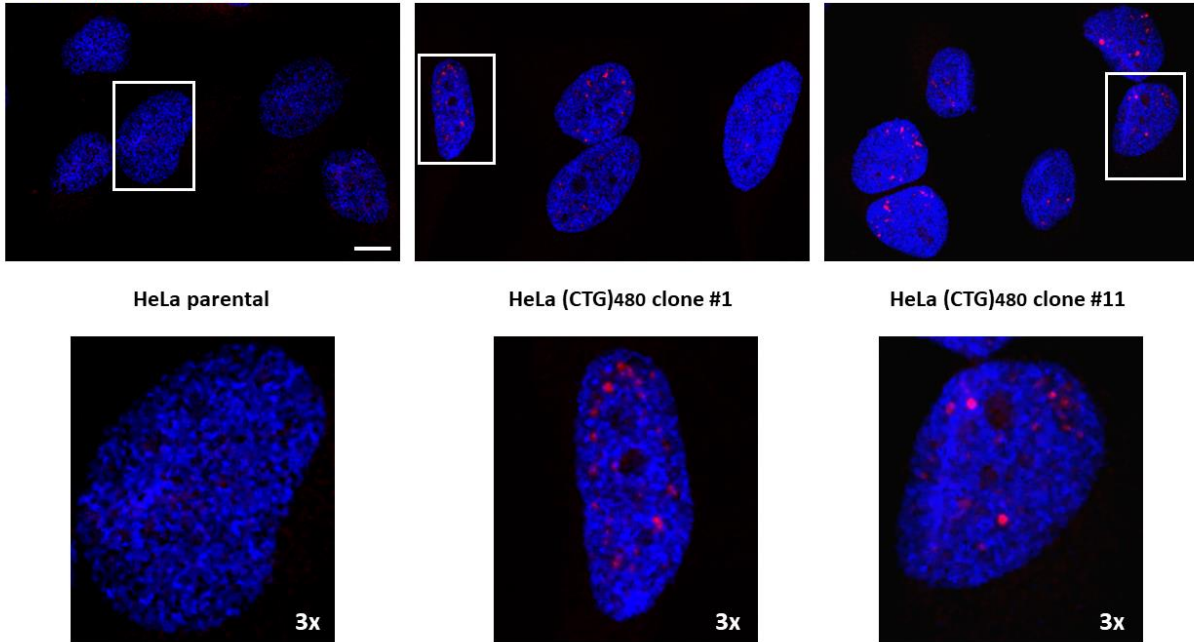

**Fig. S5**

Fluorescence *in situ* hybridization for rCUG<sub>EXP</sub> foci using a Cy3-(CAG)<sub>8</sub> probe and counterstained with DAPI for nuclei. Scale bar = 10  $\mu$ m.

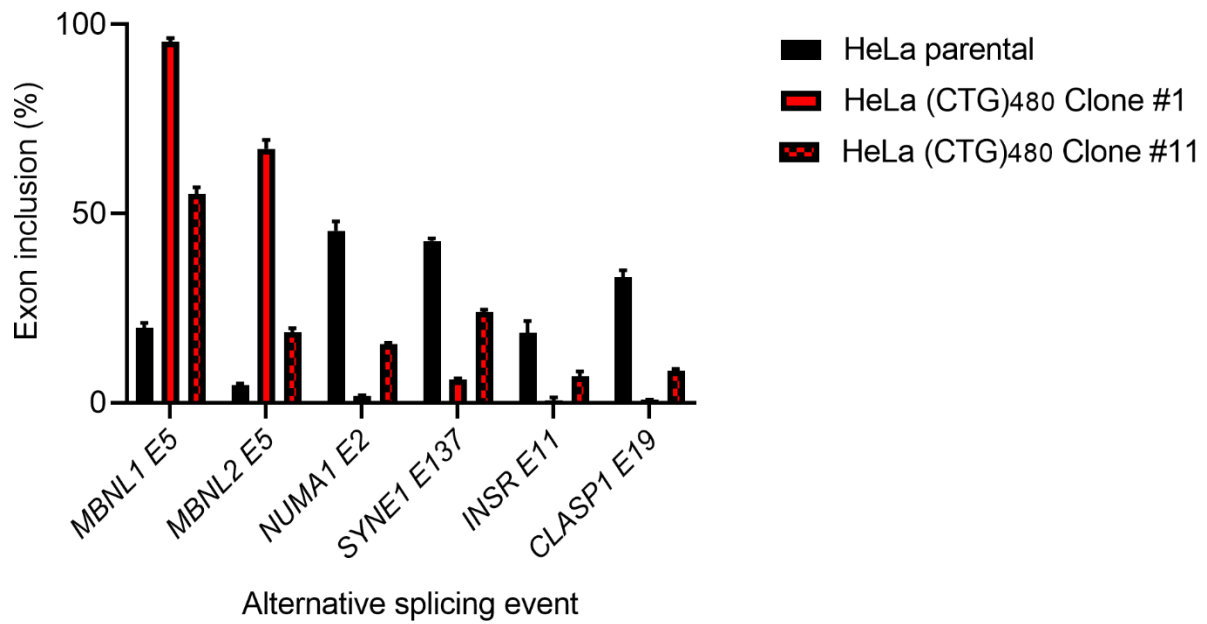

**Fig. S6**

RT-PCR isoform analysis of the indicated alternative cassette exon events comparing HeLa (CTG)480 clones #1 and 11 to the parental HeLa cell line (mean  $\pm$  s.d. n=4 biological replicates).

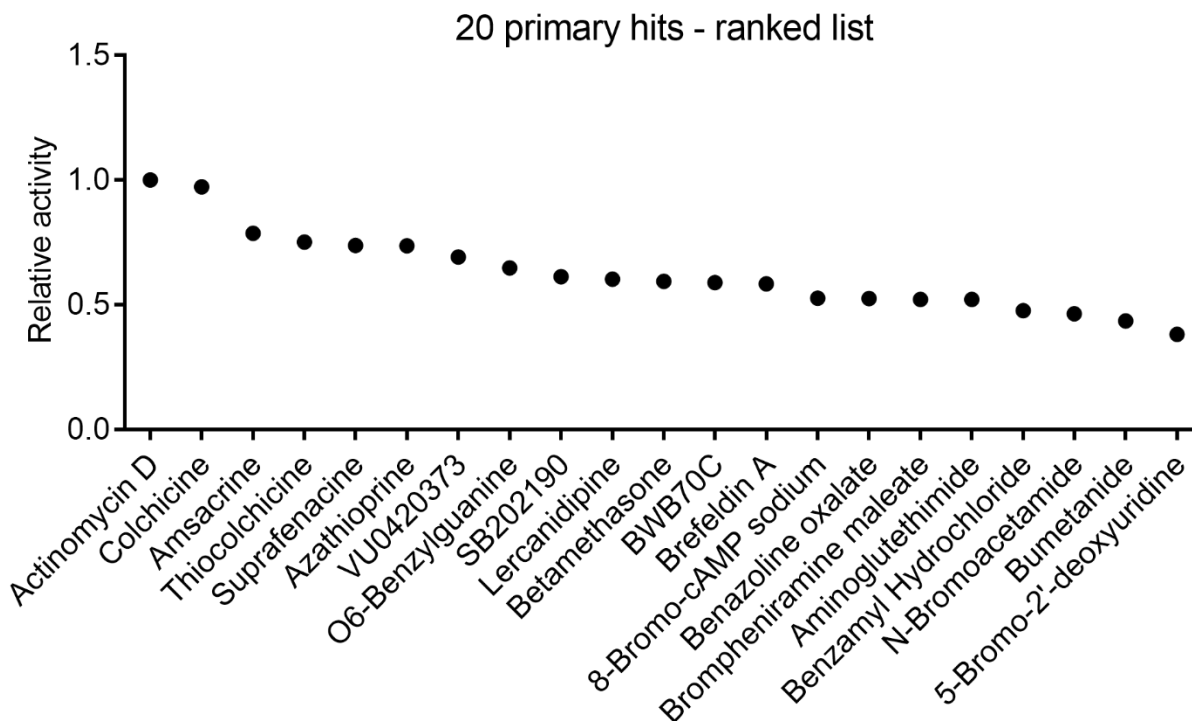

**Fig. S7.**

Ranked list of primary hits from LOPAC<sup>1280</sup> screen. The 20 hits identified from the initial screen were re-screened at 1  $\mu$ M along with Actinomycin D (ActD) at 20 nM and ranked relative to ActD (set to 1) in selective reduction of r(CUG)<sub>480</sub> levels compared to r(CUG)<sub>0</sub> (Relative activity).

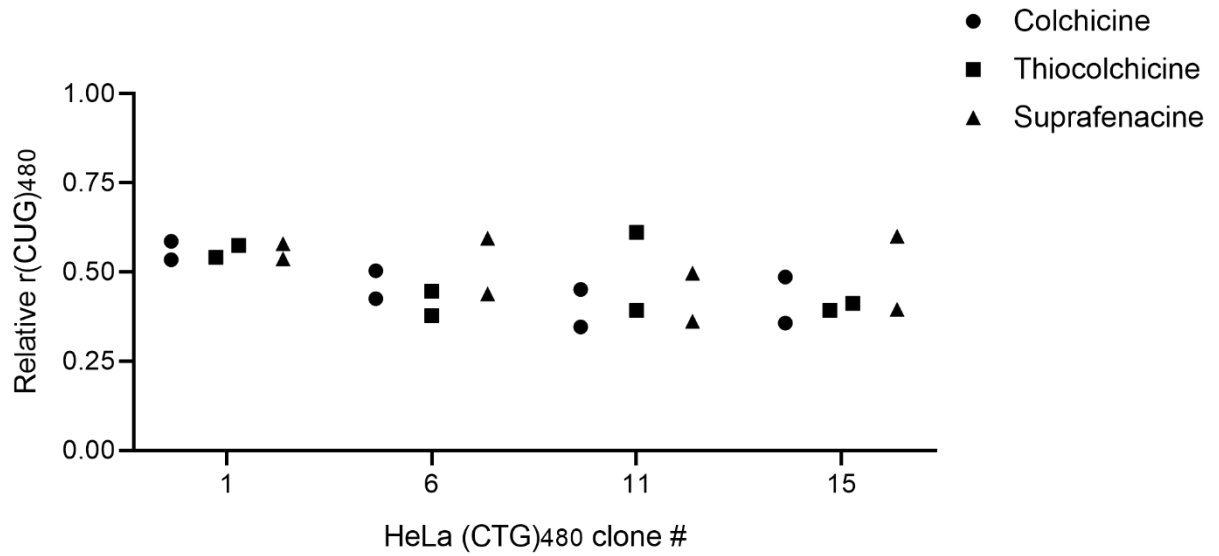

**Fig. S8.**

Clones 1, 6, 11 and 15 were re-screened with colchicine, thiocolchicine and suprafenacine at 1  $\mu$ M for ~ 24 hours and relative r(CUG)480 levels normalized to r(CUG)<sub>0</sub> were determined using RT-qPCR (n=2 biological replicates).



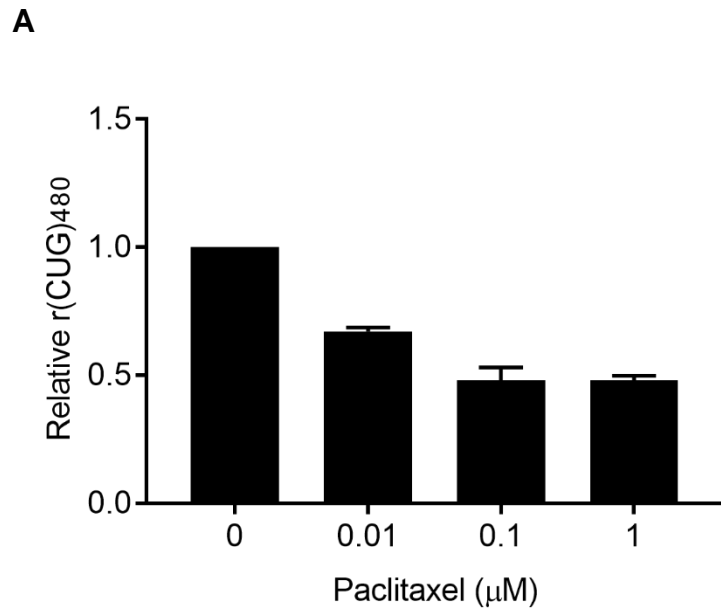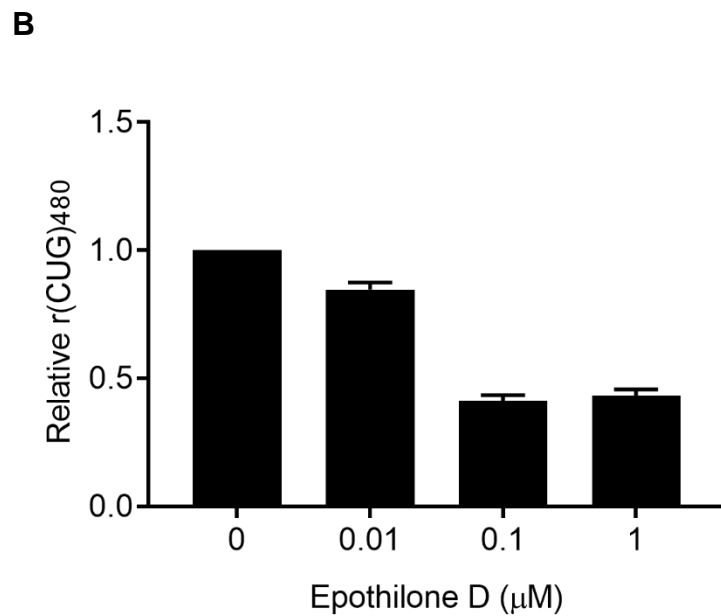

**Fig. S9.**

Effect of microtubule stabilizing agents (A) paclitaxel (Taxol) and (B) Epothilone D treatment on relative r(CUG)<sub>480</sub> levels. HeLa (CTG)<sub>480</sub> clone #19 was treated at the indicated concentrations, RNA was extracted and the relative r(CUG)<sub>480</sub> levels (normalized to r(CUG)<sub>0</sub>) were determined using RT-qPCR (mean  $\pm$  s.d. n=3 biological replicates).

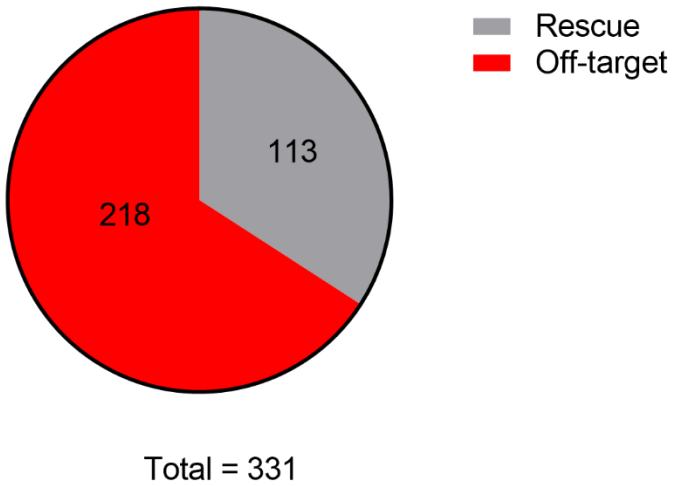

**Fig. S10.**

Transcript changes in *HSA<sup>LR</sup>* mice treated with colchicine. 'Rescue' were transcripts displaying reversion following colchicine-treatment of *HSA<sup>LR</sup>* mice toward wild type mice ( $\geq 10\%$  change,  $P < 0.1$ ). 'Off-target' were those transcript changes resulting from colchicine treatment vs PBS control treatment of *HSA<sup>LR</sup>* mice ( $\geq 10\%$ ,  $P < 0.1$ ) that were not different between wild type and PBS control-treated *HSA<sup>LR</sup>* mice.

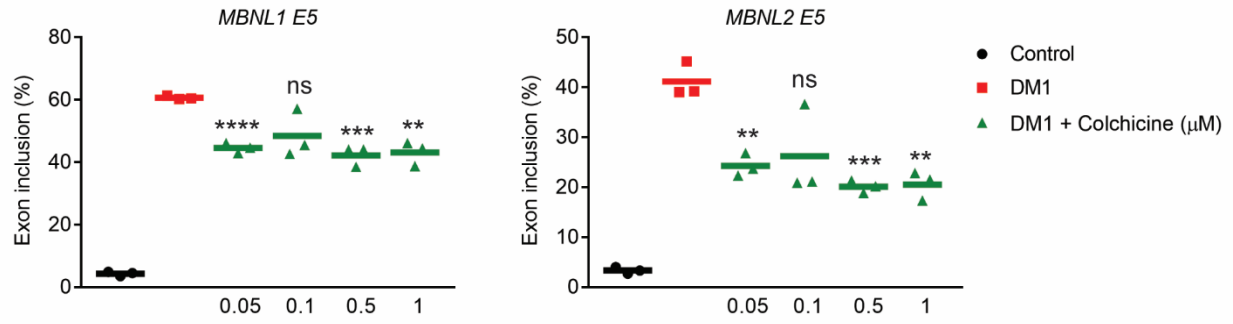

**Fig. S11.**

Effect of colchicine treatment on MBNL-dependent mis-splicing in differentiated DM1 myotubes. RT-PCR isoform analysis of the indicated alternative cassette exon events following treatment of DM1 myotubes with DMSO or colchicine at the indicated dose. (mean, n=3 biological replicates, ns = not significant, \*\* $P < 0.01$ , \*\*\* $P < 0.001$ , \*\*\*\* $P < 0.0001$ ). Control myotubes treated with DMSO were used to determine wildtype alternative splicing levels (Control).

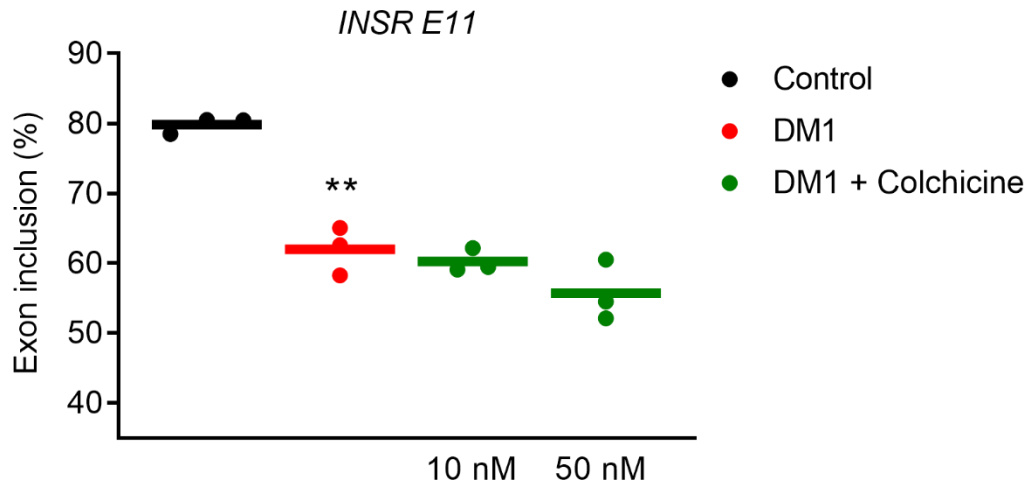

**Fig. S12**

Effect of colchicine treatment on mis-splicing of insulin receptor exon 11 in patient-derived fibroblasts. RT-PCR isoform analysis of the indicated alternative cassette exon events following treatment of DM1 myotubes with DMSO or colchicine at the indicated dose. (mean, n=3 biological replicates,  $**P < 0.01$ ). Control fibroblasts treated with DMSO were used to determine wildtype alternative splicing levels (Control).

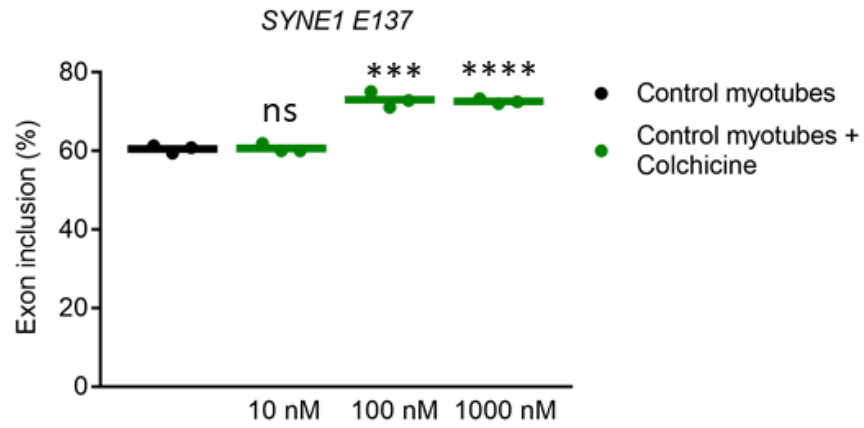

**Fig. S13.**

Effect of colchicine treatment on control myotubes for inclusion of *SYNE1* exon 137 (mean  $\pm$  s.d. n=3 biological replicates, ns = not significant, \*\*\* $P$  < 0.001, \*\*\*\* $P$  < 0.0001).

**A**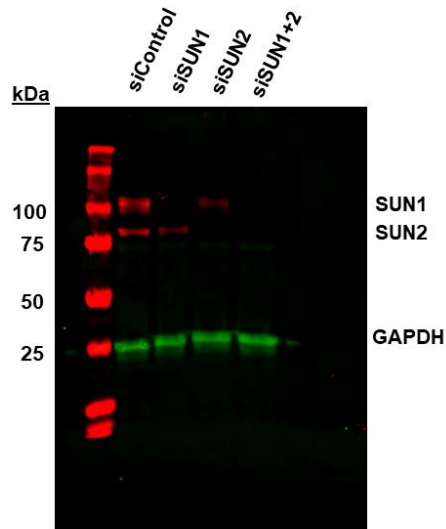**B**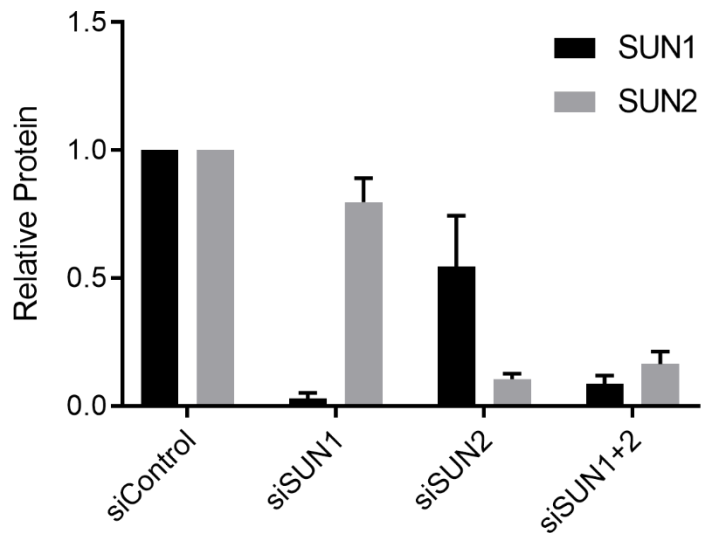**Fig. S14**

(A) Representative Western blot probing for SUN1 and SUN2 proteins and GAPDH as a loading control. Protein lysates were obtained from HeLa (CTG)480 clone #19 that was treated with control siRNA (siControl), siRNA against SUN1 alone (siSUN1) or SUN2 alone (siSUN2) or SUN1 and SUN2 in combination (siSUN1+2) (B) Quantification of blots (mean  $\pm$  s.d. n=4 biological replicates).

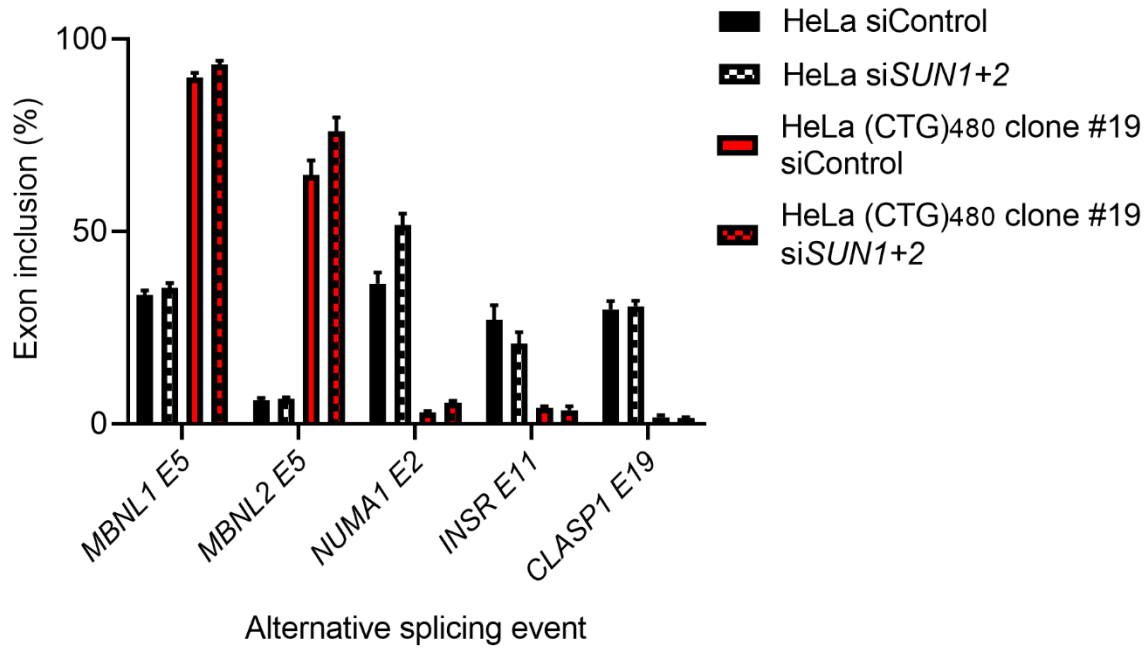

**Fig. S15**

RT-PCR isoform analysis of the indicated alternative cassette exon events in the HeLa parental cell line and the HeLa (CTG)480 clone #19 treated with a control siRNA (siControl) or siRNA against both *SUN1* and *SUN2* (siSUN1+2) (mean  $\pm$  s.d. n=4 biological replicates).

## Primers and probes

### Primers/probes used for screening

| Name       | Sequence                                             |
|------------|------------------------------------------------------|
| HT_RT      | 5'-CTACACGACGCTCTTCCGATCTTCTTATCGAATGTCGGGGTCTCAGTGC |
| HT_Forward | 5'-CGATCTCTGCCTGCTTACTC                              |
| HT_Reverse | 5'-GTCGGAGGACGAGGTCAATAAA                            |
| HT_Probe1  | /56FAM/AGAGCAGCG/ZEN/CAAGTGAGGAGG/3IABkFQ/           |
| HT_Probe2  | /5HEX/TGACGCAGC/ZEN/CACGTGAAGGTC/3IABkFQ/            |

### Primers used for qPCR

| Target             | Forward Primer            | Reverse Primer            |
|--------------------|---------------------------|---------------------------|
| Human <i>DMPK</i>  | 5'-CACGTTTTGGATGCACTGAGAC | 5'-GATGGAGGGCCTTTTATTCGCG |
| Human <i>GAPDH</i> | 5'-AATCCCATCACCATCTTCCA   | 5'-TGGACTCCACGACGTA CTCA  |
| Human <i>SUN1</i>  | 5'-TCAGCTTCGGTCAGAGACG    | 5'-TGGTGAAAGGCCATAAAGTCA  |
| Human <i>SUN2</i>  | 5'-AAACTGCTGCTCGCATCC     | 5'-GAGTCTTGCTGATGCTCTGCT  |

### Primers used for RT-PCR splicing analysis.

| Target                     | Forward Primer                  | Reverse Primer               |
|----------------------------|---------------------------------|------------------------------|
| Human <i>MBNL1</i> exon5   | 5'-AGGGAGATGCTCTCGGGAAAAGTG     | 5'-GTTGGCTAGAGCCTGTTGGTATTGG |
| Human <i>MBNL2</i> exon5   | 5'-ACAAGTGACAACACCGTAACCG       | 5'-TTTGGTAAAGGATGAAGAGCACC   |
| Human <i>NUMA1</i> exon2   | 5'-AAGTATGAGGGTGCCAAGGT         | 5'-CTTCAGCTTCTGCTGCTGCA      |
| Human <i>SYNE1</i> exon137 | 5'-GACAAAGATTTCTACCTCCGGGG      | 5'-CCCAGTTGTCGGATCTGTGACTC   |
| Human <i>INSR</i> exon11   | 5'-CCTGTCCAAGACAGACTCTCAGATCCTG | 5'-GTCGAGGAAGTGTTGGGAAAGC    |
| Human <i>CLASP1</i> exon19 | 5'-CAAAGTCTCCTCATCTTCGGGCACG    | 5'-GCTGGGACTGTGAAACCACTTTAGC |
| Mouse <i>Atp2a1</i> exon22 | 5'-GCTCATGGTCCTCAAGATCTCAC      | 5'-GGGTCAGTGCCTCAGCTTTG      |
| Mouse <i>Clcn1</i> exon7a  | 5'-TGAAGGAATACCTCACACTCAAGG     | 5'-CACGGAACACAAAGGCACTG      |
| Mouse <i>Clasp1</i> exon13 | 5'-CAAATCTGTGTCGACGACAGGA       | 5'-GCTGAGACTGTGAAACCACTTTGG  |
